# Supplementary material for: Rewilding Apex Predators Has Effects on Lower Trophic Levels: Cheetahs and Ungulates in a Woodland Savanna
Source: MDPI journal article supplement (doi:10.3390/ani12243532), 2022-12-14

**Supplementary Information:**

Dallas B. Ruble, Stijn Verschuere, Bogdan Cristescu\* and Laurie L. Marker. Rewilding Apex  
Predators Has Effects on Lower Trophic Levels: Cheetahs and Ungulates in a Woodland  
Savanna. *Animals*.

\* bogdan@cheetah.org

Supplementary Table S1: Frequency of cheetahs released in Bellebenno A per year with  
waterhole survey occurrence.

| Year | Releases | Waterhole survey<br>occurrence |
|------|----------|--------------------------------|
| 2004 | 3        | No                             |
| 2005 | 1        | No                             |
| 2006 | 0        | No                             |
| 2007 | 3        | No                             |
| 2008 | 5        | Yes                            |
| 2009 | 0        | Yes                            |
| 2010 | 4        | Yes                            |
| 2011 | 5        | Yes                            |
| 2012 | 14       | Yes                            |
| 2013 | 1        | Yes                            |
| 2014 | 5        | Yes                            |

Supplementary Table S2: The average ( $\bar{x}$ ) and standard deviation ( $SD$ ) of individual ungulate, herd records, and duration of stay at waterholes during treatment 1 (2008-2014) and treatment 0 (2015-2019).

| Individual ungulate |           |       |        |       |
|---------------------|-----------|-------|--------|-------|
| Treatment           | Estimates | Small | Medium | Large |
| Cheetah presence    | $\bar{x}$ | 0.49  | 0.02   | 2.00  |
|                     | $SD$      | 1.16  | 0.15   | 4.28  |
| Cheetah absence     | $\bar{x}$ | 0.60  | 1.13   | 0.80  |
|                     | $SD$      | 1.25  | 3.71   | 2.82  |
| Herd records        |           |       |        |       |
| Treatment           | Estimates | Small | Medium | Large |
| Cheetah presence    | $\bar{x}$ | 0.44  | 0.02   | 0.79  |
|                     | $SD$      | 1.02  | 0.15   | 1.67  |
| Cheetah absence     | $\bar{x}$ | 0.48  | 0.30   | 0.35  |
|                     | $SD$      | 1.00  | 0.79   | 0.97  |
| Duration of stay    |           |       |        |       |
| Treatment           | Estimates | Small | Medium | Large |
| Cheetah presence    | $\bar{x}$ | 17.48 | 5.50   | 17.69 |
|                     | $SD$      | 21.67 | 6.36   | 17.48 |
| Cheetah absence     | $\bar{x}$ | 13.23 | 7.31   | 9.24  |
|                     | $SD$      | 13.62 | 6.58   | 10.49 |

Supplementary Table S3: BIC random effect and fixed effect model estimates to determine best fit model for individual visitation rate by body size.

|                          | Random effect | Fixed effect |
|--------------------------|---------------|--------------|
|                          | BIC           | BIC          |
| Negative Binomial        | 803.342       | 797.274      |
| Zero-inflated Poisson    | 870.880       | 870.024      |
| Poisson                  | 1591.418      | 1590.925     |
| Goodness of fit analysis | Pr(>Chisq)    | Pr(>Chisq)   |
| Negative Binomial        | 1.000         |              |

Supplementary Table S4: BIC random effect and fixed effect model estimates to determine best fit model for herd record visitation rate.

|                          | Random effect | Fixed effect |
|--------------------------|---------------|--------------|
|                          | BIC           | BIC          |
| Negative Binomial        | 674.988       | 673.115      |
| Zero-inflated Poisson    | 679.184       | 668.919      |
| Poisson                  | 830.217       | 824.149      |
| Goodness of fit analysis | Pr(>Chisq)    | Pr(>Chisq)   |
| Negative Binomial        | 1.000         |              |

Supplementary Figure S1: Duration of waterhole visits for small, medium, and large ungulates in response to cheetah presence (treatment 1) or absence (treatment 0).

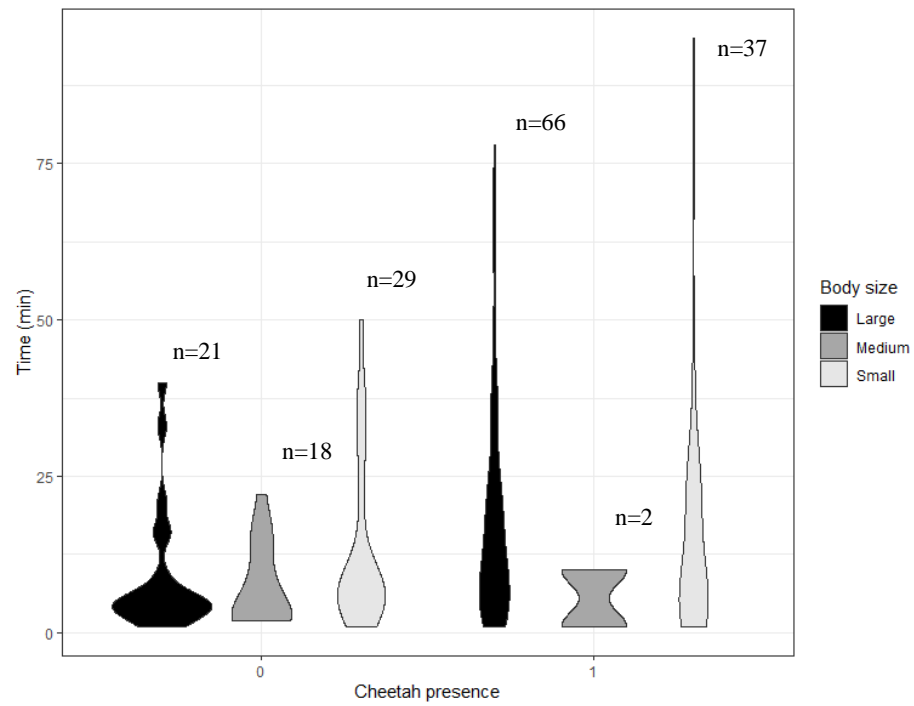

Supplementary Figure S2: Activity overlap among ungulates during cheetah presence (treatment 1) and absence (treatment 0). Small, medium, and large ungulates are pooled. The x-axis ticks indicate ungulate observation records. The shaded area below the two curves illustrates the overlap in ungulate activity patterns between the two treatments. Dhat1 is the coefficient of overlap.

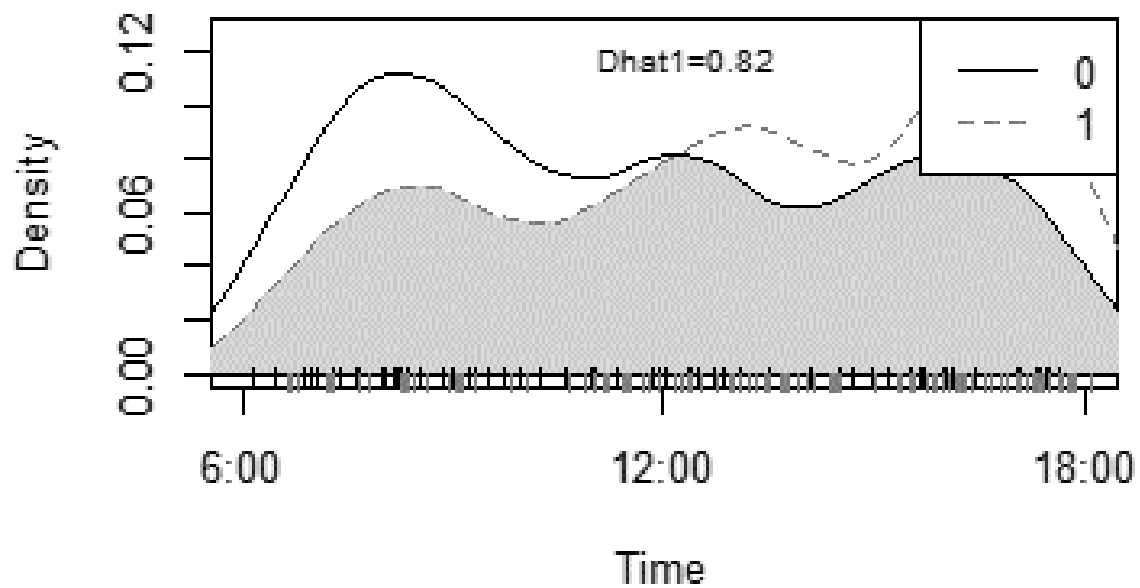

Supplement: s1 [file s1]
